# Supplementary material for: Predicting Daily Sheltering Arrangements among Youth Experiencing Homelessness Using Diary Measurements Collected by Ecological Momentary Assessment
Source: Int J Environ Res Public Health. 2020 Sep 20;17(18):6873. doi: 10.3390/ijerph17186873 (PMC7558709; doi:10.3390/ijerph17186873)
Supplement: Supplementary file 1 [file ijerph-17-06873-s001.pdf]

### **Supplementary Material**

The supplementary material for the present manuscript includes two tables. Table S1 includes a full account of the candidate predictors entered into the component-wise gradient boosting algorithm. Table S2 describes the results from the first pass through the algorithm. These retained 35 predictors were then entered into a second pass through the algorithm with a more intense penalty to maximize parsimony.

**Table S1. Full Predictor Set - Daily Item Endorsement and Descriptive Statistics.**

| Daily Question          | Variable Level                           | Not Endorsed | Endorsed | Endorsement Percentage | Endorsed by UH | Endorsed by LH | Endorsed by SH |
|-------------------------|------------------------------------------|--------------|----------|------------------------|----------------|----------------|----------------|
| Discriminated Against   | Yes (vs. No)                             | 657          | 67       | 9.25%                  | 33             | 31             | 3              |
| Discrimination - Reason | Age                                      | 698          | 26       | 3.59%                  | 15             | 11             | 0              |
| Discrimination - Reason | Gender                                   | 707          | 17       | 2.35%                  | 7              | 10             | 0              |
| Discrimination - Reason | Race                                     | 697          | 27       | 3.73%                  | 6              | 21             | 0              |
| Discrimination - Reason | Ethnicity                                | 711          | 13       | 1.80%                  | 4              | 9              | 0              |
| Discrimination - Reason | Religion                                 | 710          | 14       | 1.93%                  | 3              | 10             | 1              |
| Discrimination - Reason | Height or Weight                         | 711          | 13       | 1.80%                  | 4              | 9              | 0              |
| Discrimination - Reason | Other Aspect of Appearance               | 712          | 12       | 1.66%                  | 3              | 9              | 0              |
| Discrimination - Reason | Physical Disability                      | 718          | 6        | 0.83%                  | 3              | 3              | 0              |
| Discrimination - Reason | Sexual Orientation                       | 715          | 9        | 1.24%                  | 0              | 8              | 1              |
| Discrimination - Reason | Being A Smoker                           | 715          | 9        | 1.24%                  | 4              | 5              | 0              |
| Discrimination - Reason | Being Homeless                           | 697          | 27       | 3.73%                  | 4              | 21             | 2              |
| Discrimination - Reason | Being Poor                               | 700          | 24       | 3.31%                  | 4              | 21             | 2              |
| Discrimination - Reason | Nonspecified Other                       | 716          | 8        | 1.10%                  | 4              | 3              | 1              |
| Discrimination - Source | Boyfriend / Girlfriend                   | 715          | 9        | 1.24%                  | 6              | 3              | 0              |
| Discrimination - Source | Family Member                            | 707          | 17       | 2.35%                  | 13             | 4              | 0              |
| Discrimination - Source | Friend                                   | 709          | 15       | 2.07%                  | 3              | 12             | 0              |
| Discrimination - Source | Nonspecified Other                       | 692          | 32       | 4.42%                  | 7              | 24             | 1              |
| Assault - Type          | Physical (Hit, Slapped, Punched, Kicked) | 618          | 106      | 14.64%                 | 67             | 30             | 9              |
| Assault - Type          | Robbed                                   | 697          | 27       | 3.73%                  | 17             | 7              | 3              |
| Assault - Type          | Verbally Abused                          | 677          | 47       | 6.49%                  | 12             | 30             | 5              |
| Assault - Type          | Held Against Will                        | 718          | 6        | 0.83%                  | 2              | 3              | 1              |
| Assault - Source        | Boyfriend / Girlfriend                   | 687          | 37       | 5.11%                  | 21             | 13             | 3              |
| Assault - Source        | Friend / Stranger / Acquaintance         | 687          | 37       | 5.11%                  | 18             | 14             | 5              |
| Assault - Source        | Family Member                            | 705          | 19       | 2.62%                  | 9              | 10             | 0              |

|                             |                                  |     |     |        |    |    |    |
|-----------------------------|----------------------------------|-----|-----|--------|----|----|----|
| Assault - Source            | Nonspecified Other               | 675 | 49  | 6.77%  | 28 | 20 | 1  |
| Police - Interacted With    | Yes (vs. No)                     | 666 | 58  | 8.01%  | 35 | 20 | 3  |
| Police - Arrested By        | Yes (vs. No)                     | 705 | 19  | 2.62%  | 14 | 4  | 1  |
| Sex - Had Sex Yesterday     | Yes (vs. No)                     | 589 | 135 | 18.65% | 74 | 53 | 8  |
| Sex - Partner               | Boyfriend / Girlfriend           | 631 | 93  | 12.85% | 53 | 34 | 6  |
| Sex - Partner               | Prostitute                       | 718 | 6   | 0.83%  | 4  | 1  | 1  |
| Sex - Partner               | Other                            | 676 | 48  | 6.63%  | 27 | 20 | 1  |
| Sex - Type                  | Oral                             | 659 | 65  | 8.98%  | 35 | 26 | 4  |
| Sex - Type                  | Vaginal                          | 617 | 107 | 14.78% | 61 | 40 | 6  |
| Sex - Type                  | Anal                             | 704 | 20  | 2.76%  | 11 | 8  | 1  |
| Sex - Partner Gender        | Male                             | 668 | 56  | 7.73%  | 28 | 25 | 3  |
| Sex - Partner Gender        | Female                           | 647 | 77  | 10.64% | 45 | 28 | 4  |
| Sex - Partner Gender        | Non-Binary                       | 717 | 7   | 0.97%  | 4  | 2  | 1  |
| Sex - Planned               | Yes (vs. No)                     | 648 | 76  | 10.50% | 47 | 26 | 3  |
| Sex - Asked Partner To Have | Yes (vs. Other Options)          | 644 | 80  | 11.05% | 47 | 26 | 3  |
| Sex - Asked Partner To Have | No (vs. Other Options)           | 682 | 42  | 5.80%  | 13 | 26 | 3  |
| Sex - Asked Partner To Have | I Don't Know (vs. Other Options) | 711 | 13  | 1.80%  | 8  | 4  | 1  |
| Sex - Permission Given      | Yes (vs. Other Options)          | 633 | 91  | 12.57% | 49 | 37 | 5  |
| Sex - Permission Given      | No (vs. Other Options)           | 687 | 37  | 5.11%  | 21 | 14 | 2  |
| Sex - Permission Given      | I Don't Know (vs. Other Options) | 717 | 7   | 0.97%  | 4  | 2  | 1  |
| Sex - Condom Used           | Never (vs. Other Options)        | 663 | 61  | 8.43%  | 34 | 24 | 3  |
| Sex - Condom Used           | Sometimes (vs. Other Options)    | 684 | 40  | 5.52%  | 25 | 14 | 1  |
| Sex - Condom Used           | Always (vs. Other Options)       | 690 | 34  | 4.70%  | 15 | 15 | 4  |
| Sex - Traded Sex            | No (vs. Other Options)           | 706 | 18  | 2.49%  | 64 | 46 | 7  |
| Sex - Traded Sex            | Yes (vs. Other Options)          | 607 | 117 | 16.16% | 10 | 7  | 1  |
| Sex - Pornography Used      | Yes                              | 576 | 148 | 20.44% | 73 | 64 | 11 |

|                           |                                                 |     |     |        |     |     |    |
|---------------------------|-------------------------------------------------|-----|-----|--------|-----|-----|----|
|                           | (vs. No)                                        |     |     |        |     |     |    |
| Stress - Stressor         | Money                                           | 444 | 280 | 38.67% | 118 | 122 | 40 |
| Stress - Stressor         | Job                                             | 510 | 214 | 29.56% | 89  | 86  | 39 |
| Stress - Stressor         | Pregnancy                                       | 666 | 58  | 8.01%  | 44  | 10  | 4  |
| Stress - Stressor         | Parenting                                       | 637 | 87  | 12.02% | 52  | 31  | 4  |
| Stress - Stressor         | Family Member Health                            | 658 | 66  | 9.12%  | 32  | 30  | 4  |
| Stress - Stressor         | Not Having A Place To Stay                      | 552 | 172 | 23.76% | 47  | 104 | 21 |
| Stress - Stressor         | Personal Health                                 | 632 | 92  | 12.71% | 38  | 44  | 10 |
| Stress - Stressor         | Personal Safety                                 | 631 | 93  | 12.85% | 32  | 50  | 11 |
| Stress - Stressor         | Hunger                                          | 594 | 130 | 17.96% | 37  | 73  | 20 |
| Stress - Stressor         | Boyfriend / Girlfriend Issues                   | 584 | 140 | 19.34% | 79  | 53  | 8  |
| Stress - Stressor         | Friends                                         | 632 | 92  | 12.71% | 36  | 41  | 15 |
| Stress - Stressor         | Drugs                                           | 656 | 68  | 9.39%  | 24  | 38  | 6  |
| Stress - Stressor         | Alcohol                                         | 696 | 28  | 3.87%  | 13  | 15  | 0  |
| Stress - Stressor         | Other Stressor                                  | 609 | 115 | 15.88% | 50  | 38  | 27 |
| Nicotine - Products Used  | Cigarettes                                      | 424 | 300 | 41.44% | 163 | 119 | 18 |
| Nicotine - Products Used  | Chewing Tobacco / Snuff                         | 703 | 21  | 2.90%  | 13  | 7   | 1  |
| Nicotine - Products Used  | E-Cigarettes                                    | 692 | 32  | 4.42%  | 22  | 10  | 0  |
| Nicotine - Products Used  | Hookah                                          | 694 | 30  | 4.14%  | 18  | 9   | 3  |
| Nicotine - Products Used  | Nicotine Replacement (Gum / Lozenge / Patch)    | 686 | 38  | 5.25%  | 28  | 7   | 3  |
| Nicotine - Products Used  | Cigars / Cigarillos                             | 634 | 90  | 12.43% | 47  | 40  | 3  |
| Nicotine - Smoking Status | Current Smoker (vs. Non-smoker)                 | 117 | 607 | 83.84% | 301 | 211 | 95 |
| Nicotine - Smoking Amount | Less than 10 Cigarettes/Day (vs. Other Options) | 333 | 391 | 54.01% | 189 | 120 | 82 |
| Nicotine - Smoking Amount | More than 10 Cigarettes/Day (vs. Other Options) | 508 | 216 | 29.83% | 112 | 91  | 13 |
| Substances Used           | Kush                                            | 699 | 25  | 3.45%  | 5   | 20  | 0  |
| Substances Used           | Marijuana                                       | 694 | 30  | 4.14%  | 11  | 18  | 1  |

|                              |                                       |             |           |        |     |     |    |
|------------------------------|---------------------------------------|-------------|-----------|--------|-----|-----|----|
| Substances Used              | Ecstasy                               | 586         | 138       | 19.06% | 85  | 46  | 7  |
| Substances Used              | Sedatives / Pain Pills                | 707         | 17        | 2.35%  | 10  | 7   | 0  |
| Alcohol - Drank Yesterday    | Yes                                   | 677         | 47        | 6.49%  | 20  | 24  | 3  |
| Alcohol - Drank Yesterday    | No                                    | 194         | 530       | 73.20% | 252 | 188 | 90 |
| Alcohol - Drank Yesterday    | Did Not Respond                       | 577         | 147       | 20.30% | 90  | 50  | 7  |
| Work - Engaged In            | Yes                                   | 200         | 524       | 72.38% | 240 | 198 | 86 |
| Work - Engaged In            | No                                    | 672         | 52        | 7.18%  | 31  | 14  | 7  |
| Work - Engaged In            | Did Not Respond                       | 576         | 148       | 20.44% | 91  | 50  | 7  |
| School - Attendance          | Yes                                   | 197         | 527       | 72.79% | 234 | 202 | 91 |
| School - Attendance          | No                                    | 675         | 49        | 6.77%  | 37  | 10  | 2  |
| School - Attendance          | Did Not Respond                       | 576         | 148       | 20.44% | 91  | 50  | 7  |
|                              |                                       | <b>Mean</b> | <b>SD</b> |        |     |     |    |
| Perceived Stress Scale Total | Sum of Four 5-Point Likert-Type Items | 11.4        | 4.14      |        |     |     |    |
| Sex - Number Times           | 1 to 4+                               | 0.4         | 0.96      |        |     |     |    |
| Sex - Number Partners        | 1 to 10+                              | 0.54        | 1.48      |        |     |     |    |
| Stress - Amount              | 1 (Not at all) to 5 (Extremely)       | 2.71        | 1.46      |        |     |     |    |
| Alcohol - Number Drinks      | 0 to 8+                               | 0.36        | 1.44      |        |     |     |    |

**Table S2. Component-wise Gradient Boosting Model – First Pass (35 Retained Predictors).**

Outcome predicted category = Literally Homeless or Unstable Housing (as opposed to Sheltered Night); OR > 1.0 indicate greater odds of a LH or UH night relative to a SN, while OR < 1.0 indicate lower odds relative to a SN. No shade: odds UH > SN > LH. Light gray: odds LH > SN > UH. Dark gray: UH > LH > SN. Table is ordered such by normalized average importance (high to low).

| Full Variable                                                                                  | Odds Ratio (LH) | Odds Ratio (UH) | Normalized Importance (LH) | Normalized Importance (UH) | Normalized Average Importance | Frequency Endorsed on LH Nights | Frequency Endorsed on UH Nights | Frequency Endorsed on SH Nights |
|------------------------------------------------------------------------------------------------|-----------------|-----------------|----------------------------|----------------------------|-------------------------------|---------------------------------|---------------------------------|---------------------------------|
| Who did you have sex with yesterday<br>- Prostitute                                            | 0.379           | 1.677           | 99.3%                      | 49.4%                      | 100.0%                        | 1                               | 4                               | 1                               |
| Who discriminated against you yesterday?<br>- Friend                                           | 2.660           | 0.655           | 100.0%                     | 40.4%                      | 94.2%                         | 12                              | 3                               | 0                               |
| Did you ask the person if they wanted to have sex before it happened each time? - No           | 2.262           | 0.581           | 83.4%                      | 51.9%                      | 91.4%                         | 26                              | 13                              | 3                               |
| Who did you have sex with yesterday<br>- Other                                                 | 0.860           | 2.847           | 15.5%                      | 100.0%                     | 80.5%                         | 20                              | 27                              | 1                               |
| Yesterday, I used the following substances<br>- Kush                                           | 2.165           | 0.775           | 79.0%                      | 24.4%                      | 69.1%                         | 20                              | 5                               | 0                               |
| Who discriminated against you yesterday?<br>- Boyfriend/Girlfriend                             | 0.814           | 2.020           | 21.1%                      | 67.2%                      | 61.1%                         | 3                               | 6                               | 0                               |
| Yesterday, I used the following substances<br>- Sedatives/Pain Pills                           | 0.797           | 1.646           | 23.1%                      | 47.6%                      | 48.7%                         | 7                               | 10                              | 0                               |
| What were you stressed about?<br>- Parenting                                                   | 0.947           | 1.778           | 5.6%                       | 55.0%                      | 42.4%                         | 31                              | 52                              | 4                               |
| I worked yesterday –<br>Yes                                                                    | 0.839           | 1.526           | 18.0%                      | 40.4%                      | 40.2%                         | 198                             | 240                             | 86                              |
| What were you stressed about?<br>- Hunger                                                      | 1.255           | 0.706           | 23.2%                      | 33.3%                      | 38.6%                         | 73                              | 37                              | 20                              |
| What were you stressed about?<br>- Not Having A Place To Stay                                  | 1.487           | 0.860           | 40.5%                      | 14.4%                      | 36.8%                         | 104                             | 47                              | 21                              |
| What was the main reason(s) for the discrimination that you experienced yesterday - Disability | 0.849           | 1.405           | 16.8%                      | 32.5%                      | 33.9%                         | 3                               | 3                               | 0                               |
| Were you arrested?                                                                             | 0.854           | 1.372           | 16.1%                      | 30.2%                      | 31.9%                         | 4                               | 14                              | 1                               |

|                                                                                              |       |       |       |       |       |     |     |    |
|----------------------------------------------------------------------------------------------|-------|-------|-------|-------|-------|-----|-----|----|
| - Yes                                                                                        |       |       |       |       |       |     |     |    |
| What was the main reason(s) for the discrimination that you experienced yesterday - Race     | 1.419 | 0.906 | 35.8% | 9.4%  | 30.2% | 21  | 6   | 0  |
| Yesterday, I was...[Assaulted] - Verbally Abused                                             | 1.228 | 0.881 | 21.0% | 12.1% | 22.3% | 30  | 12  | 5  |
| Who assaulted you yesterday? - Family Member                                                 | 1.306 | 0.947 | 27.3% | 5.2%  | 21.6% | 10  | 9   | 0  |
| What were you stressed about - Other                                                         | 0.844 | 1.136 | 17.3% | 12.2% | 19.9% | 38  | 50  | 27 |
| What gender was your partner(s) yesterday? - Non-binary                                      | 1.102 | 0.835 | 10.0% | 17.2% | 18.6% | 2   | 4   | 1  |
| What type of sex did you have? - Oral                                                        | 1.188 | 0.924 | 17.6% | 7.6%  | 16.9% | 26  | 35  | 4  |
| What were you stressed about - Alcohol                                                       | 0.962 | 1.218 | 4.0%  | 18.9% | 15.9% | 15  | 13  | 0  |
| Did you give your permission to have sex before it happened each time? - No                  | 0.915 | 1.136 | 9.0%  | 12.1% | 14.5% | 14  | 21  | 2  |
| Yesterday, I was...[Assaulted] – Physical (Hit/Slapped/Punched/Kicked)                       | 0.999 | 1.184 | 0.1%  | 16.2% | 11.4% | 30  | 67  | 9  |
| What type of sex did you have? – Anal                                                        | 0.944 | 1.106 | 5.9%  | 9.6%  | 10.6% | 8   | 11  | 1  |
| How stressed were you yesterday? (1 = "Not At All Stressed" to 5 = "Extremely Stressed")     | 1.054 | 0.908 | 5.4%  | 9.2%  | 10.0% | --  | --  | -- |
| How many cigarettes did you smoke yesterday - More Than 10                                   | 1.086 | 1.023 | 8.5%  | 2.2%  | 7.1%  | 91  | 112 | 13 |
| Who discriminated against you yesterday? - Family Member                                     | 0.974 | 1.076 | 2.7%  | 7.0%  | 6.7%  | 4   | 13  | 0  |
| Who assaulted you yesterday? - Friend                                                        | 1.033 | 0.943 | 3.3%  | 5.6%  | 6.1%  | 14  | 18  | 5  |
| How many cigarettes did you smoke yesterday - Fewer Than 10                                  | 0.969 | 1.051 | 3.2%  | 4.8%  | 5.5%  | 120 | 189 | 82 |
| Did you give your permission to have sex before it happened each time? - Yes                 | 1.058 | 0.993 | 5.7%  | 0.7%  | 4.3%  | 37  | 49  | 5  |
| Personal Stress Scale - Total Score                                                          | 1.010 | 0.958 | 1.0%  | 4.1%  | 3.5%  | --  | --  | -- |
| Select all nicotine products you used yesterday - E-Cigarettes                               | 0.993 | 1.032 | 0.7%  | 3.0%  | 2.6%  | 10  | 22  | 0  |
| What was the main reason(s) for the discrimination that you experienced yesterday - Homeless | 1.025 | 0.986 | 2.5%  | 1.3%  | 2.6%  | 21  | 4   | 2  |
| Select all nicotine products you used yesterday - Cigar                                      | 1.034 | 0.996 | 3.4%  | 0.4%  | 2.5%  | 40  | 47  | 3  |

|                                                  |       |       |      |      |      |    |    |   |
|--------------------------------------------------|-------|-------|------|------|------|----|----|---|
| Who discriminated against you yesterday? - Other | 1.018 | 0.994 | 1.8% | 0.6% | 1.6% | 24 | 7  | 1 |
| I worked yesterday                               | 1.006 | 1.196 | 0.0% | 0.0% | 0.0% | 50 | 91 | 7 |
